# Supplementary material for: Lessons We Have Learned Regarding Seroprevalence in High and Low SARS-CoV-2 Contexts in Greece before the Omicron Pandemic Wave
Source: MDPI journal article supplement (doi:10.3390/ijerph19106110), 2022-05-17
Supplement: s1 [file s1]

**Table S1.** Number of SARS-COV-2 infections, hospitalizations and nonhospitalized cases by date in Malesina.

| Weekly Update from the Civil Protection of the Municipality of Lokroi |                         |                  |                       |
|-----------------------------------------------------------------------|-------------------------|------------------|-----------------------|
| Date                                                                  | Active SARS-COV-2 Cases | Hospitalizations | Nonhospitalized Cases |
| 2021/1/4                                                              | 3                       | 1                | 2                     |
| 2021/1/11                                                             | 2                       | 1                | 1                     |
| 2021/1/18                                                             | 5                       | 1                | 4                     |
| 2021/1/25                                                             | 2                       | 1                | 1                     |
| 2021/2/1                                                              | 12                      | 1                | 11                    |
| 2021/2/8                                                              | 11                      | 1                | 10                    |
| 2021/2/15                                                             | 17                      | 4                | 13                    |
| 2021/2/22                                                             | 20                      | 4                | 16                    |
| 2021/3/1                                                              | 186                     | 11               | 175                   |
| 2021/3/8                                                              | 241                     | 50               | 191                   |
| 2021/3/15                                                             | 164                     | 64               | 100                   |
| 2021/3/22                                                             | 107                     | 56               | 51                    |
| 2021/3/29                                                             | 74                      | 42               | 32                    |
| 2021/4/5                                                              | 57                      | 32               | 25                    |
| 2021/4/12                                                             | 45                      | 13               | 32                    |
| 2021/4/19                                                             | 18                      | 6                | 12                    |
| 2021/4/26                                                             | 13                      | 2                | 11                    |
| 2021/5/3                                                              | 7                       | 2                | 5                     |
| 2021/5/10                                                             | 14                      | 2                | 12                    |
| 2021/5/17                                                             | 24                      | 1                | 23                    |
| 2021/5/24                                                             | 16                      | 3                | 13                    |
| 2021/5/31                                                             | 21                      | 3                | 18                    |
| Sum                                                                   | 1059                    | 301              | 758                   |

Note: Provided by the the Civil Protection of the Municipality of Lokroi.

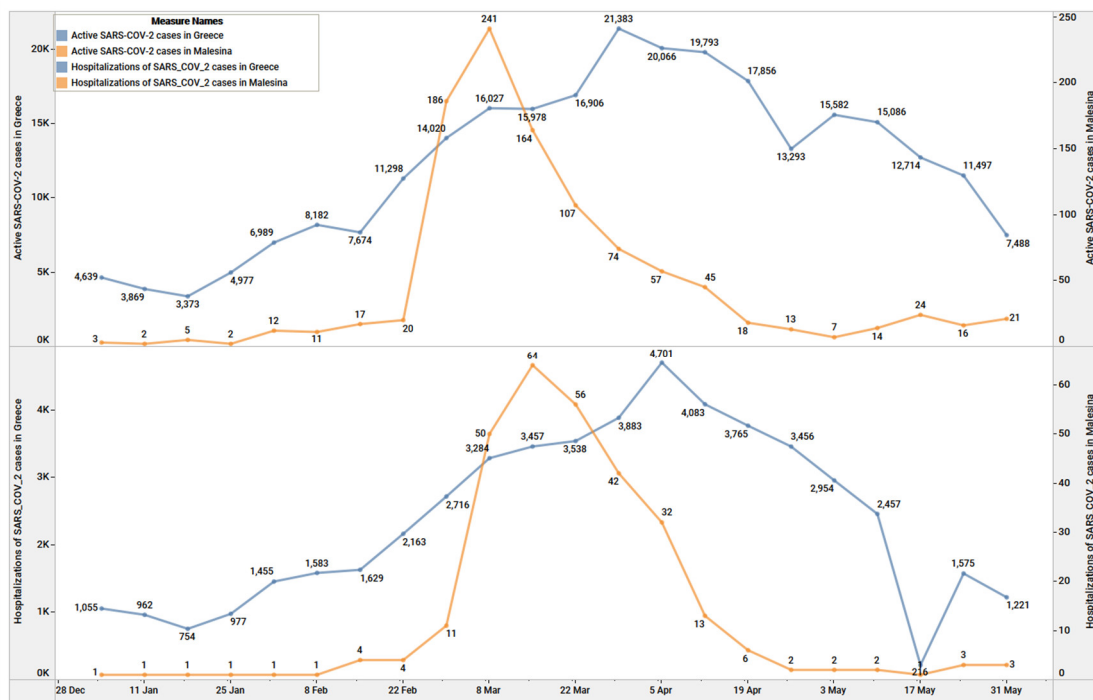

**Figure S1.** Comparisons of the active cases (upper graph) and hospitalizations between Malesina and the overall numbers for Greece (October 2020—May 2021).
